# Supplementary material for: Determination of vitamin D3 conjugated metabolites: a complementary view on hydroxylated metabolites
Source: Royal Society of Chemistry journal article supplement (doi:10.1039/d2an01982e), 2022-12-20
Supplement: d2an01982e1.pdf [file d2an01982e1.pdf]

## Supplementary Material

### Determination of vitamin D<sub>3</sub> conjugated metabolites: a complementary view to hydroxylated metabolites

L.S. Castillo-Peinado<sup>a,b,c,d</sup>, M. Calderón-Santiago<sup>a,b,c,d</sup>, R.L. Sánchez-Cano<sup>b,e</sup>, J.M. Quesada-Gómez<sup>b,d</sup>, R. Bouillon,<sup>f</sup> F. Priego-Capote<sup>a,b,c,d\*</sup>

<sup>a</sup>Department of Analytical Chemistry, Annex Marie Curie Building, Campus of Rabanales, University of Córdoba, Córdoba, Spain.

<sup>b</sup>Maimónides Institute of Biomedical Research (IMIBIC), Reina Sofía University Hospital, University of Córdoba, Córdoba, Spain.

<sup>c</sup>Nanochemistry University Institute (IUNAN), Campus of Rabanales, University of Córdoba, Córdoba, Spain.

<sup>d</sup>CIBER Fragilidad y Envejecimiento Saludable (CIBERFES), Instituto de Salud Carlos III, Spain.

<sup>e</sup>Occupational Health Unit, Reina Sofía University Hospital, Córdoba, Spain.

<sup>f</sup>Clinical and Experimental Endocrinology, Department of Chronic Diseases and Metabolism, KU Leuven, Belgium.

\*Corresponding author: F. Priego-Capote (e-mail: [feliciano.priego@uco.es](mailto:feliciano.priego@uco.es)). Phone and fax: +34 957218615. Postal address: Department of Analytical Chemistry, Annex Marie Curie Building, Campus of Rabanales, University of Córdoba, Córdoba, 14014, Spain.

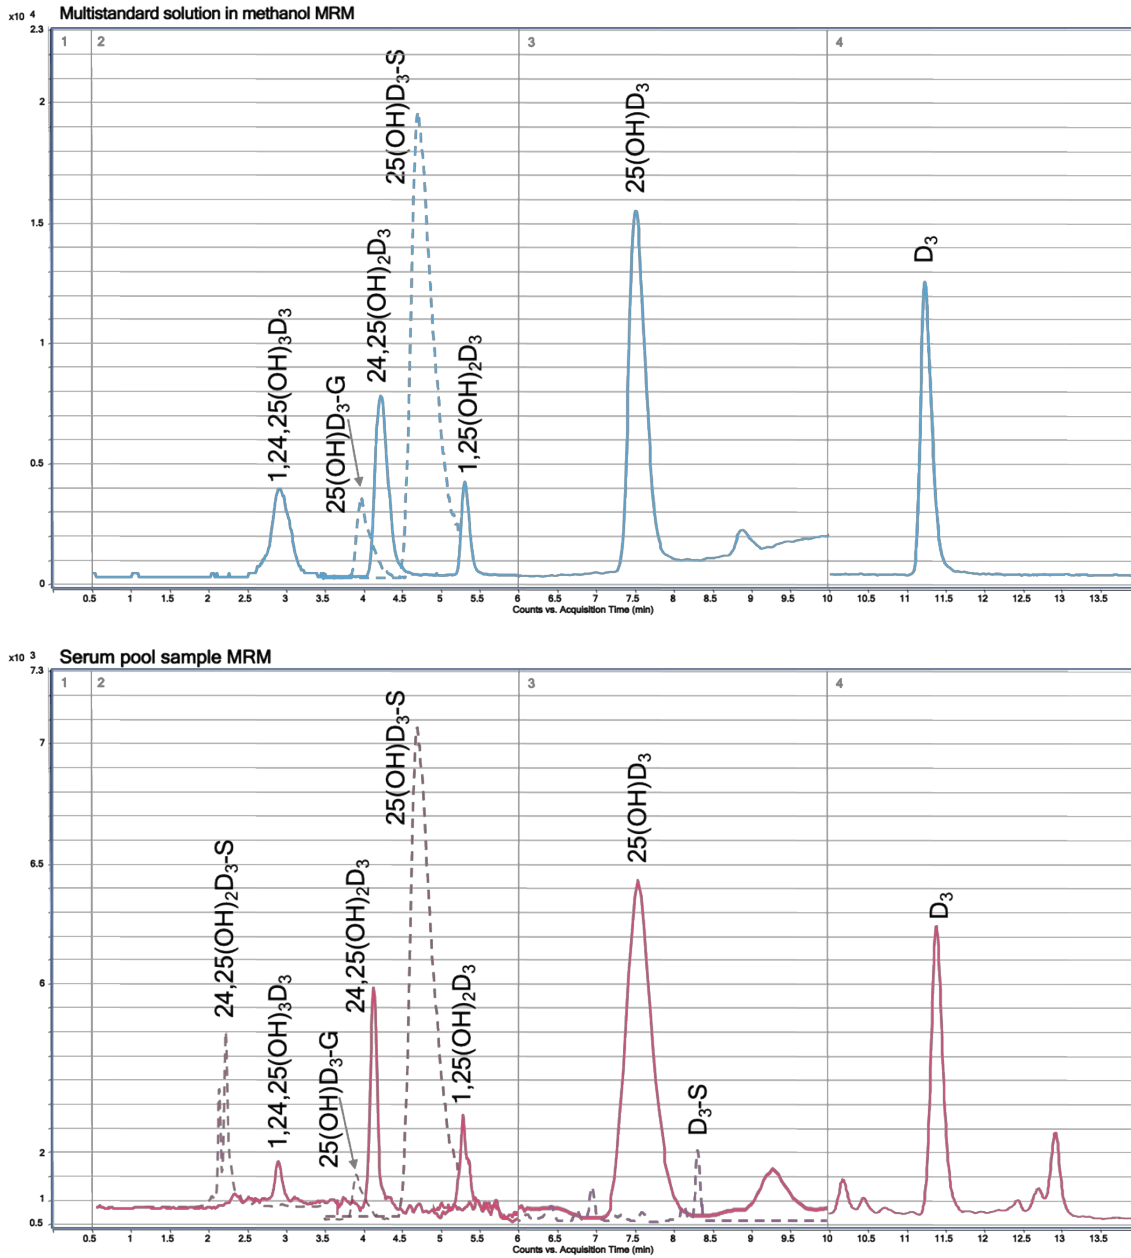

**Supplementary Fig. 1.** Chromatograms obtained from MRM analyses of a multistandard solution in methanol (blue) and a serum pool sample (pink).

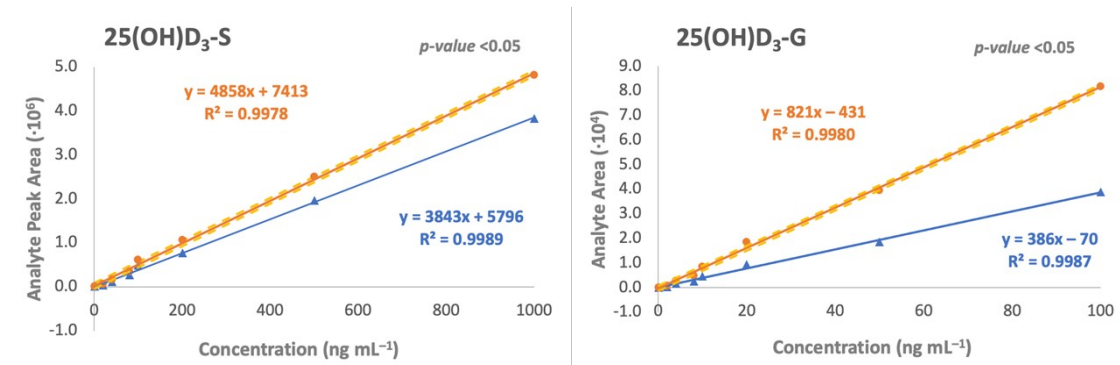

**Supplementary Fig. 2.** Estimated matrix effects for representative conjugated metabolites included in the proposed quantitative method by comparing calibration curves of standard solutions in methanol (orange circles) and spiked human serum aliquots (blue triangles).

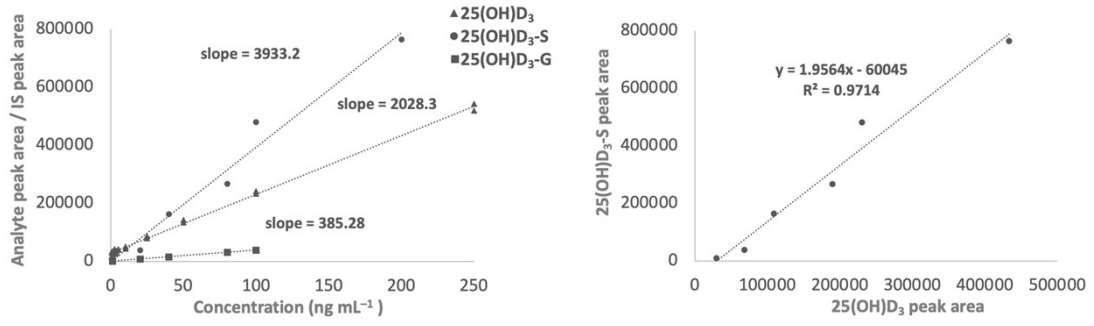

**Supplementary Fig. 3.** Comparison between 25(OH)D<sub>3</sub>, 25(OH)D<sub>3</sub>-G and 25(OH)D<sub>3</sub>-S calibration curves to check the suitability of the 25(OH)D<sub>3</sub>-d<sub>3</sub> as internal standard for quantitation of both conjugated metabolites and correlation between 25(OH)D<sub>3</sub> and 25(OH)D<sub>3</sub>-S calibration curves slopes.

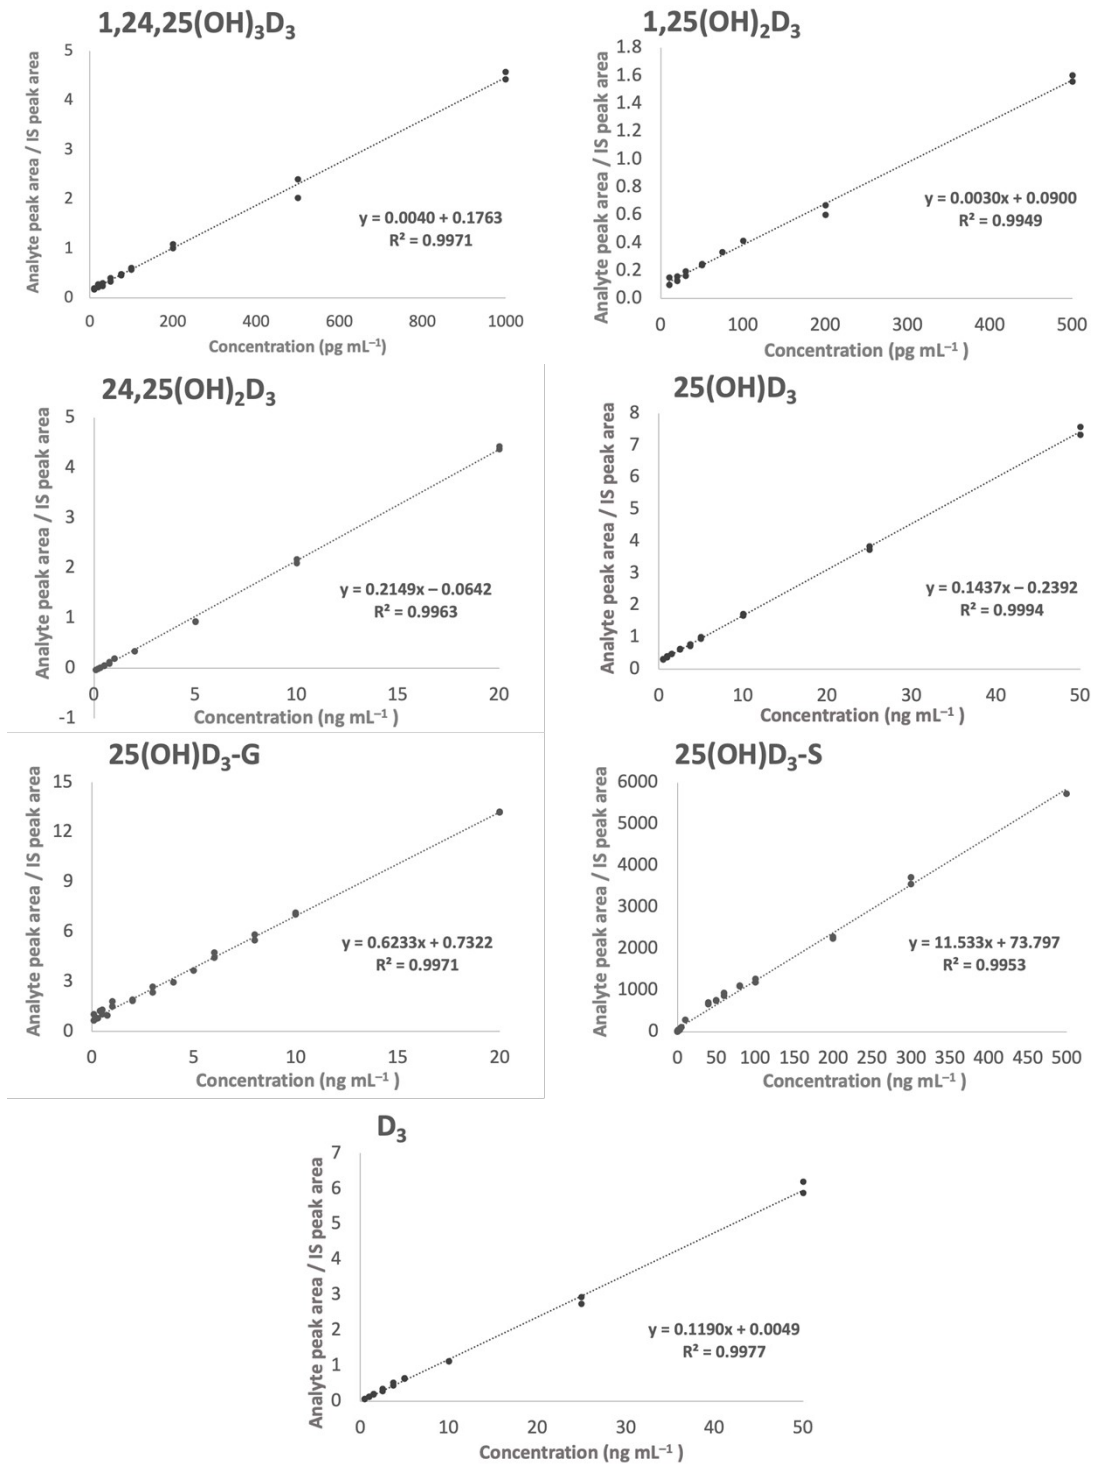

Supplementary Fig. 4. Calibration curves for target metabolites analyzed with the proposed method.

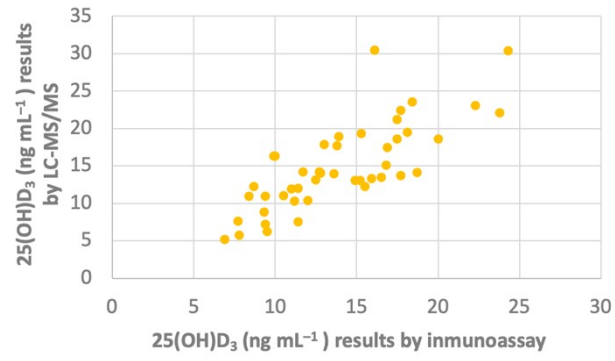

**Supplementary Fig. 5.** Correlation of 25(OH)<sub>2</sub>D<sub>3</sub> results obtained by immunoassay and LC-MS/MS analysis of serum samples in the studied cohort.

**Supplementary Table 1.** Evaluation of accuracy and precision of the proposed method for quantitation of hydroxylated and conjugated metabolites of vitamin D<sub>3</sub>.

| Analyte                   | Concentration level     | Matrix effect* (%) with not using IS | Matrix effect† (%) using IS |
|---------------------------|-------------------------|--------------------------------------|-----------------------------|
| 25(OH)D <sub>3</sub> -3-G | 2 ng mL <sup>-1</sup>   | 32.3                                 | 17.2                        |
|                           | 10 ng mL <sup>-1</sup>  | 21.5                                 | 14.2                        |
|                           | 20 ng mL <sup>-1</sup>  | 23.0                                 | 15.0                        |
| 25(OH)D <sub>3</sub> -3-S | 20 ng mL <sup>-1</sup>  | 46.5                                 | -5.7                        |
|                           | 100 ng mL <sup>-1</sup> | 23.7                                 | -14.9                       |
|                           | 200 ng mL <sup>-1</sup> | 25.0                                 | -14.2                       |

\* $(\text{Measured concentration in serum} - \text{Measured concentration in methanol}) / \text{Measured concentration in methanol}$ , expressed as a percentage. Concentrations are estimated interpolating analytes peak areas in calibration curves represented by analytes peak areas *versus* concentration levels.

† $(\text{Measured concentration in serum} - \text{Measured concentration in methanol}) / \text{Measured concentration in methanol}$ , expressed as a percentage. Concentrations are estimated interpolating ratios of analytes and ISs peak areas in calibration curve represented by ratios of analytes and ISs peak areas *versus* concentration levels.

**Supplementary Table 2.** Concentrations of 25(OH)D<sub>3</sub> and 1,25(OH)<sub>2</sub>D<sub>3</sub> obtained by analysis of DEQAS samples with the proposed method, and bias (expressed in %) from the corresponding reference values.

| <b>25(OH)D<sub>3</sub></b>                  |       |       |        |       |       |
|---------------------------------------------|-------|-------|--------|-------|-------|
| <b>Samples</b>                              | 487   | 488   | 490    | 498   | 499   |
| <b>Proposed method (ng mL<sup>-1</sup>)</b> | 84.2  | 59.4  | 120.3  | 28.5  | 43.1  |
| <b>NIST (ng mL<sup>-1</sup>)</b>            | 92.2  | 65.6  | 116.5  | 28.3  | 49.8  |
| <b>ALTM* (ng mL<sup>-1</sup>)</b>           | 100.3 | 69    | 129.4  | 31.7  | 54.2  |
| <b>Bias from NIST (%)</b>                   | 8.7%  | 9.5%  | -3.3%  | -0.7% | 13.5% |
| <b>Bias from ALTM* (%)</b>                  | 16.1% | 13.9% | 7.0%   | 10.1% | 20.5% |
| <b>1,25(OH)<sub>2</sub>D<sub>3</sub></b>    |       |       |        |       |       |
| <b>Sample code</b>                          | 343   | 344   | 345    | 355   | 356   |
| <b>Proposed method (pg mL<sup>-1</sup>)</b> | 105.1 | 83.8  | 94.5   | 127.5 | 135.6 |
| <b>LC-MS/MS (pg mL<sup>-1</sup>)</b>        | 100.4 | 91.9  | 84.5   | 124.8 | 152.6 |
| <b>ALTM* (pg mL<sup>-1</sup>)</b>           | 114.3 | 87.1  | 103.4  | 144.7 | 180.7 |
| <b>Bias from LC-MS/MS (%)</b>               | -4.7% | 8.8%  | -11.8% | -2.2% | 11.1% |
| <b>Bias from ALTM* (%)</b>                  | 8.0%  | 3.8%  | 8.6%   | 11.9% | 25.0% |

ALTM\*; All-Laboratory Trimmed Mean, average of results from five different analytical techniques recognized by DEQAS program.
